# Supplementary material for: Overexpression of NR4A1 is associated with tumor recurrence and poor survival in non-small-cell lung carcinoma
Source: PubMed Central journal article supplement (PMC5768379; doi:10.18632/oncotarget.23048), 2017-12-08
Supplement: oncotarget-08-113977-s001.pdf [file oncotarget-08-113977-s001.pdf]

# Overexpression of NR4A1 is associated with tumor recurrence and poor survival in non-small-cell lung carcinoma

## SUPPLEMENTARY MATERIALS

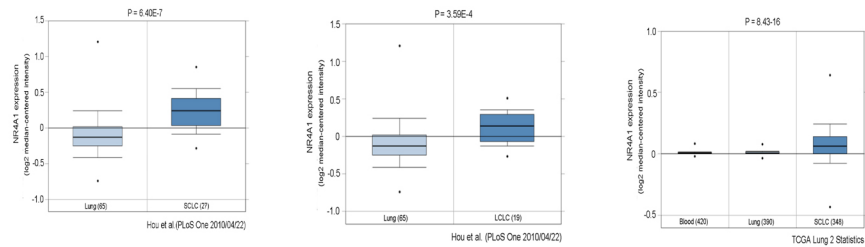

**Supplementary Figure 1: The NR4A1 expression levels in human NSCLC in published datasets detected by OncoPrint analysis.**
